# Supplementary material for: Wild and Domestic Pig Interactions at the Wildlife–Livestock Interface of Murchison Falls National Park, Uganda, and the Potential Association with African Swine Fever Outbreaks
Source: PubMed Central journal article supplement (PMC4831202; doi:10.3389/fvets.2016.00031), 2016-04-14
Supplement: datasheet_2.pdf [file datasheet_2.pdf]

# Survey Uganda

I confirm that: (i) I have understood the explanation of the research as set out in the project information sheet. (ii) I have had the opportunity to ask questions about the research and I am happy that my questions have been answered. (iii) I am happy to answer the questions that the research team asks me. I know that if I do not want to answer any question I can say "I do not want to answer that". (iv) I know that my answers to questions will be stored and used in ways that keep my name and the exact location of my farm private and confidential. (v) I understand that the research team will tell veterinary authorities about what the whole research project finds out, but my personal data and answers will remain confidential. (vi) The researchers can use photographs of my farm or family in talks or articles about the research.

\*

 OK

## Introduction

### Gender

 M F

### Location

GPS coordinates can only be collected when outside.

latitude (x.y °)

longitude (x.y °)

altitude (m)

accuracy (m)

### Subcountry

---

### Perish

---

### Village

---

## Household demographics and characteristics

» 1.How many of the following do you have in your homestead at the moment?

**Type of pig**

- Breeding sow       Breeding boars       Growers  
 Piglets       None

**Number of pigs****» 2. Which housing system(s) do you use throughout the year?****Housing system**

- Free range       Tethering  
 House

**Month**

- January       February       March  
 April       May       June  
 July       August       September  
 October       November       December  
 Equally throughout the year

**3. Last year, did you ever notice the presence of soft ticks on your farm or surroundings?**

- Yes  
 No

**3.1. Where did you see them?**

- In holes or crevices in your home
- In holes or crevices in your pig sty
- On wild pig's burrows
- Other

**Please specify**  

---

**4. How do your pigs access water?**

- Private water trough - only for your pigs
- Natural water trough (river, lakes, ponds)- shared with other pigs or wildlife
- Both natural and private                       Other

**Please specify**  

---

**5. How far away from your household is that water source?**

- <500 m                       500 m - 2km
- >2 km

**6. Are you also a wild pig hunter?**

- Yes
- No

» **6.1. Specify the average number of hunted wildpigs during last year according to the period of the year when you hunted them.**

**Type of pig**

- Bushpig       Warthog

**Month**

- January       February       March  
 April       May       June  
 July       August       September  
 October       November       December

**Number****6.2. Where do you slaughter the wild pig carcasses you hunt?**

- At the hunting area       At home       At the market  
 Other

**Please specify**  

---

**6.3. After slaughtering the wild pigs, what do you do with the left-overs?**

- Burn them       Bury them       Leave them on the field  
 Feed them to the dogs       Other

**Please specify**  

---

**6.4. Do your pigs eat the raw left overs of your hunted wild pigs?**

- Yes  
 No

**Wild pig's indirect interactions**

**7. In the last 12 months, have you seen any wild pigs in your village area?**

- Yes
- No
- I've only heard them or seen a trail

**» 7.1 On average, how close to your household do they come?****Type of pig**

- Bushpig       Warthog

**Distance**

- Less than 10 m
- 10-50 m
- 50-500 m
- > 500 m

**» 7.2. On average, how many wild pigs did you see in your village last year?****Type of pig**

- Bushpig       Warthog

**Number****» 7.3. When do you usually see them?**

**Type of pig** Bushpig Warthog**Month** January February March April May June July August September October November December Equally throughout the year**» 7.4. Where have you seen them more often?****Type of pig** Bushpig Warthog**Location** Cassava fields Onion fiels Mangoes areas Maize fields Ground nut fields Bush Puddle Lake River Other

Please specify

---

### Wild pig's direct interactions

8. In the last 12 months, have you seen wild pigs being together (same location within 100 m at the same time) with domestic pigs in your village?

Yes

No

» 8.1. Where did those "contacts" happened more often?

### Type of pig

Bushpig

Warthog

### Location

Cassava fields

Onion fiels

Mangoes areas

Maize fields

Ground nut fields

Bush

Puddle

Lake

River

Other

» 8.2. For "Bushpig", please specify which type of "contact" and how much time the animals spent together.

**Type of interaction**

- Mating - courtship       Fighting       Eating together
- Drinking together

**Number of times per year**

- 1 - 5       6 - 10
- > 10

**Duration**

- < 10 min       < 1 h
- 1 - 3 h

» 8.2. For "Warthog", please specify which type of "contact" and how much time the animals spent together.



**Type of interaction**

- Mating - courtship       Fighting       Eating together  
 Drinking together

**Number of times per year**

- 1 - 5       6 - 10  
 > 10

**Duration**

- < 10 min       < 1 h  
 1 - 3 h

**» 8.3. For "Bushpig", during last year, when did those "contacts" happen more often?****Type of interaction**

- Mating - courtship       Fighting       Eating together  
 Drinking together

**Month**

- January       February       March  
 April       May       June  
 July       August       September  
 October       November       December  
 Equally throughout the year

**» 8.3. For "Warthog", during last year, when did those "contacts" happen more often?**

**Type of interaction**

- Mating - courtship       Fighting       Eating together
- Drinking together

**Month**

- |                                  |                                   |                                    |
|----------------------------------|-----------------------------------|------------------------------------|
| <input type="checkbox"/> January | <input type="checkbox"/> February | <input type="checkbox"/> March     |
| <input type="checkbox"/> April   | <input type="checkbox"/> May      | <input type="checkbox"/> June      |
| <input type="checkbox"/> July    | <input type="checkbox"/> August   | <input type="checkbox"/> September |
| <input type="checkbox"/> October | <input type="checkbox"/> November | <input type="checkbox"/> December  |

» 9. On average, do you remember the distance between your pigs and wild pigs when you saw the "contacts"?

**Type of pig**

- Bushpig       Warthog

**Distance**

- < 1 m       1 - 10 m       11 - 50 m
- 51 - 100 m       > 100 m

10. If mating "contacts" occurred with bushpigs, in which way did it happen?

- Domestic female mating with male bushpigs
- Domestic male mating with female bushpigs

10.1. If they gave birth (after mating with bushpigs), how many piglets did you get last year?

**10.2. What did you do with this offspring?**

- I used them for own consumption
- I sold them as piglets
- I sold them as growers
- I kept them as breeders
- Other

**Please specify**

---

**11. If fighting "contacts" occurred, were any pigs wounded?**

- Yes
- No

**11.1. Why did they fight for?**

- Mating
- Food
- Water
- I don't know

**12. If drinking "contacts" occurred, how far away from your household is that water source?**

- < 500 m
- 500 m - 2 km
- > 2 km

**Perception and management of direct interactions****13. Are "contacts" with wild pigs a nuisance to you?**

- Yes
- No

**13.1. Please specify why**

- Fear of transmission of disease to my pigs
- Crop damage
- Other

**Please specify**

---

**14. Have you taken any measure to specifically avoid "contacts" between your pigs and wild pigs?**

Yes

No

**14.1. Specify please**

Wire fence

Banana leaves fence

Dogs

Keep the pigs housed

Keep the pig tethered

Other

**Please specify**

---

**15. Have you ever seen any warthog's burrow close to your village?**

Yes

No

**15.1. Please, specify where**

< 1 km away

1 - 3 km away

> 3 km

**Disease information**

**16. During the last 12 months, have you seen a lot of your pigs dying at once?**

Yes

No

**16.1. If yes, do you suspect it was caused by African swine fever?**

- Yes
- No
- I don't know

**16.2. When did the deaths happen?**

- |                                                      |                                   |                                    |
|------------------------------------------------------|-----------------------------------|------------------------------------|
| <input type="checkbox"/> January                     | <input type="checkbox"/> February | <input type="checkbox"/> March     |
| <input type="checkbox"/> April                       | <input type="checkbox"/> May      | <input type="checkbox"/> June      |
| <input type="checkbox"/> July                        | <input type="checkbox"/> August   | <input type="checkbox"/> September |
| <input type="checkbox"/> October                     | <input type="checkbox"/> November | <input type="checkbox"/> December  |
| <input type="checkbox"/> Equally throughout the year |                                   |                                    |

**» 16.3. How many pigs...****How many pigs...**

- ...did you have before the outbreak?       ...died during the outbreak?
- ...recovered after showing signs of disease?
- ...remained healthy throughout the whole outbreak?

**Number of animal****» 16.4. During the outbreak, if you had offspring from bushpig mating,...**

**How many of them...**

- ...died?                       ...recovered after showing signs of disease?
- ...remained healthy throughout the whole outbreak?

**Number of animal****16.5. What did you do with the carcass of your dead pigs?**

- |                                             |                                    |                                               |
|---------------------------------------------|------------------------------------|-----------------------------------------------|
| <input type="checkbox"/> Burn it            | <input type="checkbox"/> Buried it | <input type="checkbox"/> Left it on the field |
| <input type="checkbox"/> Fed it to the dogs | <input type="checkbox"/> Eat it    | <input type="checkbox"/> Sell it              |
| <input type="checkbox"/> Other              |                                    |                                               |

**Please specify**

---

**16.6. Have you ever seen wild pigs around these carcasses of your domestic pigs?**

- Yes
- No
